# Supplementary material for: Estimating emissions of biogenic volatile organic compounds from urban green spaces and their contributions to secondary pollution
Source: Royal Society of Chemistry journal article supplement (doi:10.1039/d4ea00099d), 2024-12-04
Supplement: d4ea00099d1.pdf [file d4ea00099d1.pdf]

*Supplement of*

**Estimating emissions of biogenic volatile organic compounds from urban green spaces and their contributions to secondary pollution**

Jinlong Ma<sup>1</sup>, Shuai Wang<sup>1</sup>, GuoChao Chen<sup>1</sup>, Shengqiang Zhu<sup>1</sup>, Peng Wang<sup>2</sup>, Jianmin Chen<sup>1</sup>,

5 Hongliang Zhang<sup>1,3,4\*</sup>

<sup>1</sup>Shanghai Key Laboratory of Atmospheric Particle Pollution and Prevention, Department of Environmental Science and Engineering, Fudan University, Shanghai, China

<sup>2</sup>Department of Atmospheric and Oceanic Science, Fudan University, Shanghai 200438, China

10 <sup>3</sup>IRDR ICoE on Risk Interconnectivity and Governance on Weather/Climate Extremes Impact and Public Health, Fudan University, Shanghai, China

<sup>4</sup>Institute of Eco-Chongming (IEC), Shanghai 200062, China

\*Correspondence to: Hongliang Zhang ([zhanghl@fudan.edu.cn](mailto:zhanghl@fudan.edu.cn))

15

**Table S1** The sources of satellite datasets

| Datasets                 | Year      | Temporal Resolution | Spatial Resolution | Source                                                                                                                                                                                                                    |
|--------------------------|-----------|---------------------|--------------------|---------------------------------------------------------------------------------------------------------------------------------------------------------------------------------------------------------------------------|
| Leaf Area Index Datasets |           |                     |                    |                                                                                                                                                                                                                           |
| GLASS                    | 2000-2021 | 8 days              | 500 m              | Available at <a href="http://www.glass.umd.edu/LAI/MODIS/">http://www.glass.umd.edu/LAI/MODIS/</a> , last access: 11 April 2022                                                                                           |
| Land Cover Datasets      |           |                     |                    |                                                                                                                                                                                                                           |
| MODIS MCD12Q1            | 2001-2021 | Yearly              | 500 m              | Available at <a href="https://search.earthdata.nasa.gov/">https://search.earthdata.nasa.gov/</a> , last access: 10 April 2022                                                                                             |
| C3S LC                   | 1992-2021 | Yearly              | 300 m              | Available at <a href="https://cds.climate.copernicus.eu/cdsapp#!/dataset/satellite-land-cover?tab=form">https://cds.climate.copernicus.eu/cdsapp#!/dataset/satellite-land-cover?tab=form</a> , last access: 21 March 2022 |
| CGLS LC                  | 2015-2019 | Yearly              | 100 m              | Available at <a href="https://land.copernicus.eu/global/products/lc">https://land.copernicus.eu/global/products/lc</a> , last access: 15 April 2022                                                                       |
| FROM-GLC10               | 2017      | Yearly              | 10 m               | Available at <a href="https://data-starcloud.pcl.ac.cn/zh/resource/1">https://data-starcloud.pcl.ac.cn/zh/resource/1</a>                                                                                                  |

**Table S2** WRF model physics schemes used in this study

| Physical mechanism   | Scheme                        | Reference                                |
|----------------------|-------------------------------|------------------------------------------|
| Microphysics         | Thompson scheme               | Thompson <i>et al.</i> <sup>1</sup>      |
| Long-wave radiation  | RRTM scheme                   | Iacono <i>et al.</i> <sup>2</sup>        |
| Short-wave radiation | Goddard short wave            | Chou and Suarez <sup>3</sup>             |
| Land Surface         | Thermal diffusion scheme      | Dudhia <sup>4</sup>                      |
| PBL Scheme           | YSU scheme                    | Hong; Hong <i>et al.</i> <sup>5, 6</sup> |
| Cumulus parameter    | Grell-Freitas ensemble scheme | Grell and Freitas <sup>7</sup>           |

20 **Table S3** The area of urban tree area in each district in Beijing, unit is km<sup>2</sup>

| Number | District             | Official data | C3S   | CGLS  | MCD12Q1 | FROM-GLC10 | FROM-GLC10-U |
|--------|----------------------|---------------|-------|-------|---------|------------|--------------|
| 1      | Dongcheng District   | 8.8           | 2.2   | 0.7   | 0.0     | 2.3        | 7.0          |
| 2      | Xicheng District     | 7.3           | 1.7   | 0.5   | 0.0     | 1.9        | 6.1          |
| 3      | Chaoyang District    | 114.0         | 19.6  | 17.6  | 0.0     | 15.3       | 81.8         |
| 4      | Haidian District     | 110.2         | 25.7  | 28.8  | 9.4     | 44.3       | 84.5         |
| 5      | Fengtai District     | 52.0          | 15.1  | 20.1  | 2.0     | 20.2       | 41.4         |
| 6      | Shijingshan District | 33.3          | 7.2   | 13.4  | 4.6     | 16.8       | 23.9         |
| 7      | Mentougou District   | 11.4          | 14.7  | 21.2  | 10.5    | 28.7       | 8.2          |
| 8      | Fangshan District    | 66.2          | 32.9  | 70.7  | 17.4    | 61.5       | 58.9         |
| 9      | Tongzhou District    | 40.4          | 11.9  | 23.7  | 0.0     | 2.8        | 26.4         |
| 10     | Shunyi District      | 40.4          | 8.0   | 12.9  | 0.5     | 15.9       | 30.2         |
| 11     | Changping District   | 51.0          | 23.5  | 46.7  | 30.7    | 60.7       | 42.8         |
| 12     | Daxing District      | 46.3          | 11.7  | 23.4  | 0.0     | 3.0        | 30.5         |
| 13     | Huairou District     | 15.0          | 4.7   | 12.0  | 8.7     | 12.9       | 12.8         |
| 14     | Pinggu District      | 8.8           | 1.4   | 3.6   | 1.4     | 5.4        | 7.9          |
| 15     | Miyun District       | 13.2          | 4.6   | 13.1  | 7.4     | 14.5       | 11.3         |
| 16     | Yanqing District     | 14.6          | 1.8   | 6.4   | 3.1     | 9.4        | 13.4         |
|        | Total                | 632.9         | 186.7 | 314.8 | 95.7    | 315.6      | 487.1        |

**Table S4** The area of urban green spaces in each district in Beijing, unit is km<sup>2</sup>

| Number | District             | Official data | C3S   | CGLS  | MCD12Q1 | FROM-GLC10 | FROM-GLC10-U |
|--------|----------------------|---------------|-------|-------|---------|------------|--------------|
| 1      | Dongcheng District   | 11.0          | 9.0   | 1.4   | 0.0     | 10.8       | 9.2          |
| 2      | Xicheng District     | 10.6          | 7.0   | 1.1   | 0.0     | 8.7        | 9.4          |
| 3      | Chaoyang District    | 148.8         | 80.0  | 26.3  | 1.0     | 134.3      | 116.6        |
| 4      | Haidian District     | 121.5         | 65.3  | 40.3  | 31.5    | 97.2       | 95.8         |
| 5      | Fengtai District     | 60.3          | 52.7  | 33.5  | 16.8    | 84.8       | 49.7         |
| 6      | Shijingshan District | 43.0          | 17.4  | 19.0  | 15.2    | 25.6       | 33.7         |
| 7      | Mentougou District   | 15.9          | 26.9  | 32.3  | 30.9    | 31.9       | 12.7         |
| 8      | Fangshan District    | 80.1          | 91.4  | 111.1 | 81.7    | 113.2      | 72.7         |
| 9      | Tongzhou District    | 56.5          | 50.7  | 35.0  | 6.6     | 61.3       | 42.5         |
| 10     | Shunyi District      | 73.6          | 32.2  | 20.0  | 18.3    | 56.6       | 63.4         |
| 11     | Changping District   | 64.6          | 73.5  | 64.2  | 70.2    | 116.4      | 56.2         |
| 12     | Daxing District      | 79.5          | 47.2  | 28.5  | 10.0    | 83.3       | 63.7         |
| 13     | Huairou District     | 22.6          | 9.7   | 14.5  | 22.9    | 16.2       | 20.4         |
| 14     | Pinggu District      | 15.6          | 3.6   | 4.7   | 5.2     | 5.9        | 14.7         |
| 15     | Miyun District       | 15.6          | 10.4  | 16.4  | 22.3    | 15.5       | 13.8         |
| 16     | Yanqing District     | 15.7          | 6.5   | 9.5   | 12.3    | 10.4       | 14.5         |
|        | Total                | 835.0         | 583.5 | 457.8 | 344.9   | 872.1      | 688.8        |

**Table S5** Indices used to evaluate model performance

| Index                         | Definition*                                                | Remarks       |
|-------------------------------|------------------------------------------------------------|---------------|
| Mean bias (MB)                | $\frac{1}{N} \sum_{i=1}^N (M_i - O_i)$                     |               |
| Root mean square error (RMSE) | $\sqrt{\frac{1}{N} \sum_{i=1}^N (M_i - O_i)^2}$            | Reported as % |
| Gross Error (GE)              | $\frac{1}{N} \sum_{i=1}^N \frac{ M_i - O_i }{O_i}$         | Reported as % |
| Mean normalized bias (MNB)    | $\frac{1}{N} \sum_{i=1}^N \frac{M_i - O_i}{O_i}$           | Reported as % |
| Mean normalized error (MNE)   | $\frac{1}{N} \sum_{i=1}^N \frac{ M_i - O_i }{O_i}$         | Reported as % |
| Mean fractional bias (MFB)    | $\frac{2}{N} \sum_{i=1}^N \frac{(M_i - O_i)}{(M_i + O_i)}$ | Reported as % |
| Mean fractional error (MFE)   | $\frac{2}{N} \sum_{i=1}^N \frac{ M_i - O_i }{(M_i + O_i)}$ | Reported as % |

25 Note: \* i represents the pairing of N observations O and predictions M by site and time.

**Table S6** Model performance of meteorological parameters temperature (T2), wind speed (WS), wind direction and relative humidity (RH) in summer in Beijing. The values without meeting the benchmarks are bolded. (PRE is prediction; OBS is observation; MB is bias; GE is gross error; and RMSE is root mean square error)

|                        | Statistics |             | Benchmarks*    |
|------------------------|------------|-------------|----------------|
| T2 (K)                 | OBS        | 297.3       |                |
|                        | PRE        | 298.4       |                |
|                        | MB         | <b>1.1</b>  | $\leq \pm 0.5$ |
|                        | GE         | <b>2.2</b>  | $\leq 2.0$     |
|                        | RMSE       | 3.0         |                |
| WS (ms <sup>-1</sup> ) | OBS        | 3.3         |                |
|                        | PRE        | 3.2         |                |
|                        | MB         | -0.05       | $\leq \pm 0.5$ |
|                        | GE         | 1.3         | $\leq 2.0$     |
|                        | RMSE       | 1.7         | $\leq 2.0$     |
| WD (°)                 | OBS        | 152.9       |                |
|                        | PRE        | 150.5       |                |
|                        | MB         | -2.4        | $\leq \pm 10$  |
|                        | GE         | <b>44.6</b> | $\leq \pm 30$  |
|                        | RMSE       | 60.9        |                |
| RH (%)                 | OBS        | 49.5        |                |
|                        | PRE        | 35.6        |                |
|                        | MB         | -14.0       |                |
|                        | GE         | 14.8        |                |
|                        | RMSE       | 18.7        |                |

30

Note: \* are benchmarks suggested by Emery *et al.*<sup>8</sup>.

**Table S7** Model performance on maximum daily average 1h (MDA1) O<sub>3</sub>, maximum daily average 8h (MDA8) O<sub>3</sub>, PM<sub>2.5</sub>, NO<sub>2</sub>, and SO<sub>2</sub> in different cases in Beijing. The values without meeting the criteria are bolded. (OBS is mean observation; PRE is mean prediction; MNB: mean normalized bias; MNE: mean normalized error; MFB: mean fractional bias; and MFE: mean fractional error).

|                                            | Statistics | B1          | B2          | B3    | B4    | B5    | Benchmarks* |
|--------------------------------------------|------------|-------------|-------------|-------|-------|-------|-------------|
| O <sub>3</sub> -1h<br>(ppb)                | OBS        | 71.68       | 71.68       | 71.68 | 71.68 | 71.68 |             |
|                                            | PRE        | 81.9        | 82.28       | 81.55 | 81.34 | 80.93 |             |
|                                            | MNB        | <b>0.16</b> | <b>0.16</b> | 0.15  | 0.15  | 0.14  | ≤±0.15      |
|                                            | MNE        | 0.22        | 0.22        | 0.21  | 0.21  | 0.2   | ≤0.3        |
|                                            | MFB        | 0.12        | 0.12        | 0.11  | 0.11  | 0.1   |             |
|                                            | MFE        | 0.19        | 0.19        | 0.18  | 0.18  | 0.17  |             |
| O <sub>3</sub> -8h<br>(ppb)                | OBS        | 68.16       | 68.16       | 68.16 | 68.16 | 68.16 |             |
|                                            | PRE        | 77.68       | 77.94       | 76.92 | 76.74 | 76.33 |             |
|                                            | MNB        | 0.13        | 0.13        | 0.12  | 0.11  | 0.11  | ≤±0.15      |
|                                            | MNE        | 0.19        | 0.19        | 0.18  | 0.17  | 0.16  | ≤0.3        |
|                                            | MFB        | 0.11        | 0.11        | 0.1   | 0.09  | 0.08  |             |
|                                            | MFE        | 0.17        | 0.17        | 0.16  | 0.15  | 0.14  |             |
| PM <sub>2.5</sub><br>(μg m <sup>-3</sup> ) | OBS        | 37.33       | 37.33       | 37.33 | 37.33 | 37.33 |             |
|                                            | PRE        | 38.59       | 39.01       | 38.24 | 38.02 | 37.88 |             |
|                                            | MNB        | 0.15        | 0.16        | 0.15  | 0.14  | 0.14  |             |
|                                            | MNE        | 0.58        | 0.59        | 0.58  | 0.57  | 0.57  |             |
|                                            | MFB        | -0.11       | -0.12       | -0.11 | -0.1  | -0.1  | ≤±0.6       |
|                                            | MFE        | 0.51        | 0.52        | 0.51  | 0.5   | 0.5   | ≤0.75       |
| NO <sub>2</sub><br>(ppb)                   | OBS        | 15.56       | 15.56       | 15.56 | 15.56 | 15.56 |             |
|                                            | PRE        | 16.08       | 16.15       | 16.03 | 15.92 | 15.83 |             |
|                                            | MNB        | 0.24        | 0.25        | 0.24  | 0.23  | 0.22  |             |
|                                            | MNE        | 0.55        | 0.56        | 0.55  | 0.54  | 0.53  |             |
|                                            | MFB        | 0.01        | 0.02        | 0.01  | 0.01  | 0     |             |
|                                            | MFE        | 0.43        | 0.44        | 0.43  | 0.42  | 0.41  |             |
| SO <sub>2</sub><br>(ppb)                   | OBS        | 2.37        | 2.37        | 2.37  | 2.37  | 2.37  |             |
|                                            | PRE        | 4.75        | 4.76        | 4.75  | 4.74  | 4.72  |             |
|                                            | MNB        | 1.80        | 1.81        | 1.80  | 1.80  | 1.79  |             |
|                                            | MNE        | 2.0         | 2.01        | 2.0   | 1.99  | 1.98  |             |
|                                            | MFB        | 0.46        | 0.47        | 0.46  | 0.45  | 0.44  |             |
|                                            | MFE        | 0.76        | 0.77        | 0.76  | 0.75  | 0.74  |             |

Note: \* are criteria suggested by EPA. <sup>9</sup>

**Table S8** The area of main plant function types (PFTs) in references and each land cover dataset in Beijing, unit is km<sup>2</sup>

| Plant function types | Official data | C3S    | CGLS   | MCD12Q1 | FROM-GLC10 |
|----------------------|---------------|--------|--------|---------|------------|
| Needleleaf tree      | 1626.0        | 1016.0 | 1232.7 | 452.4   | 361.1      |
| Broadleaf tree       | 5542.3        | 3249.0 | 5043.4 | 2877.9  | 6733.9     |
| Shrub                | 2651.2        | 894.4  | 1003.1 | 1782.1  | 535.9      |
| Grass                | 1046.9        | 2871.7 | 1706.7 | 4384.0  | 1366.9     |
| Crop                 | 2137.1        | 4854.1 | 3771.0 | 3175.4  | 4090.3     |



**Table S9** The mean fractional bias (MFB) and mean fractional error (MFE) between different cases with observations

| Case | Name              | Statics |       |
|------|-------------------|---------|-------|
| B1   | CCI               | MFB     | -0.78 |
|      | GLASS             | MFE     | 1.42  |
| B2   | CGLS              | MFB     | -1.59 |
|      | GLASS             | MFE     | 1.66  |
| B3   | MODIS             | MFB     | -2.00 |
|      | GLASS             | MFE     | 2.00  |
| B4   | FROM-<br>GLC10    | MFB     | -0.52 |
|      |                   | MFE     | 1.40  |
| B5   | FROM-<br>GLC10-Up | MFB     | -0.21 |
|      |                   | MFE     | 1.37  |

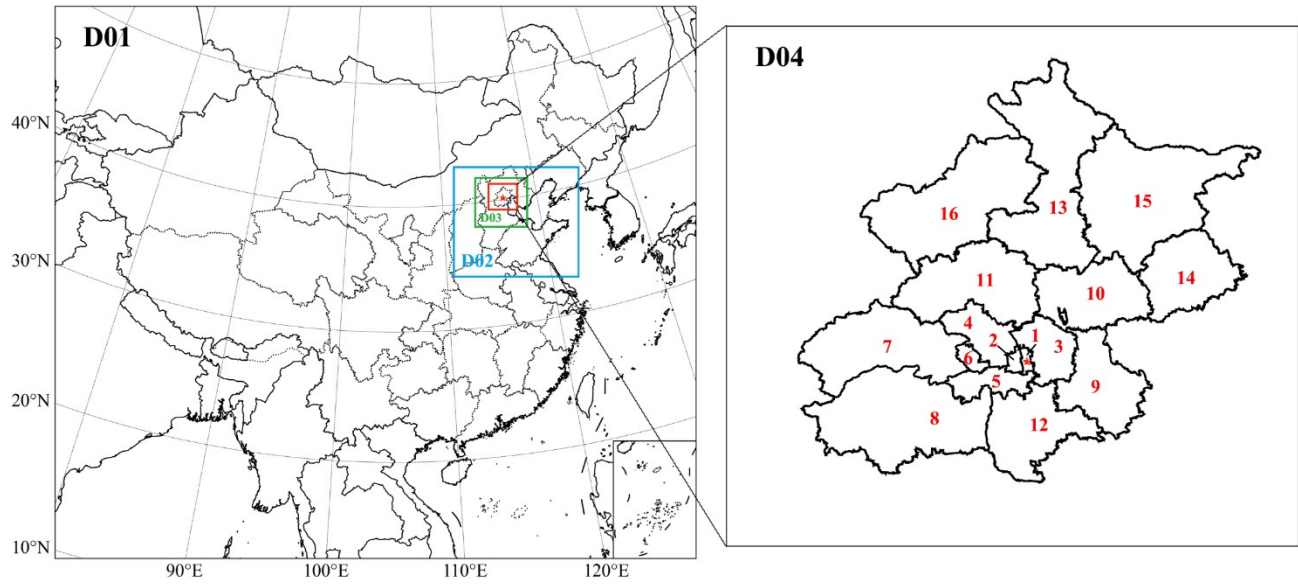

**Fig. S1** Model domain (D01:36km, D02: 12km, D03:4km, and D04:1km) with numbers of district in Beijing (according to numbers in Table S2).

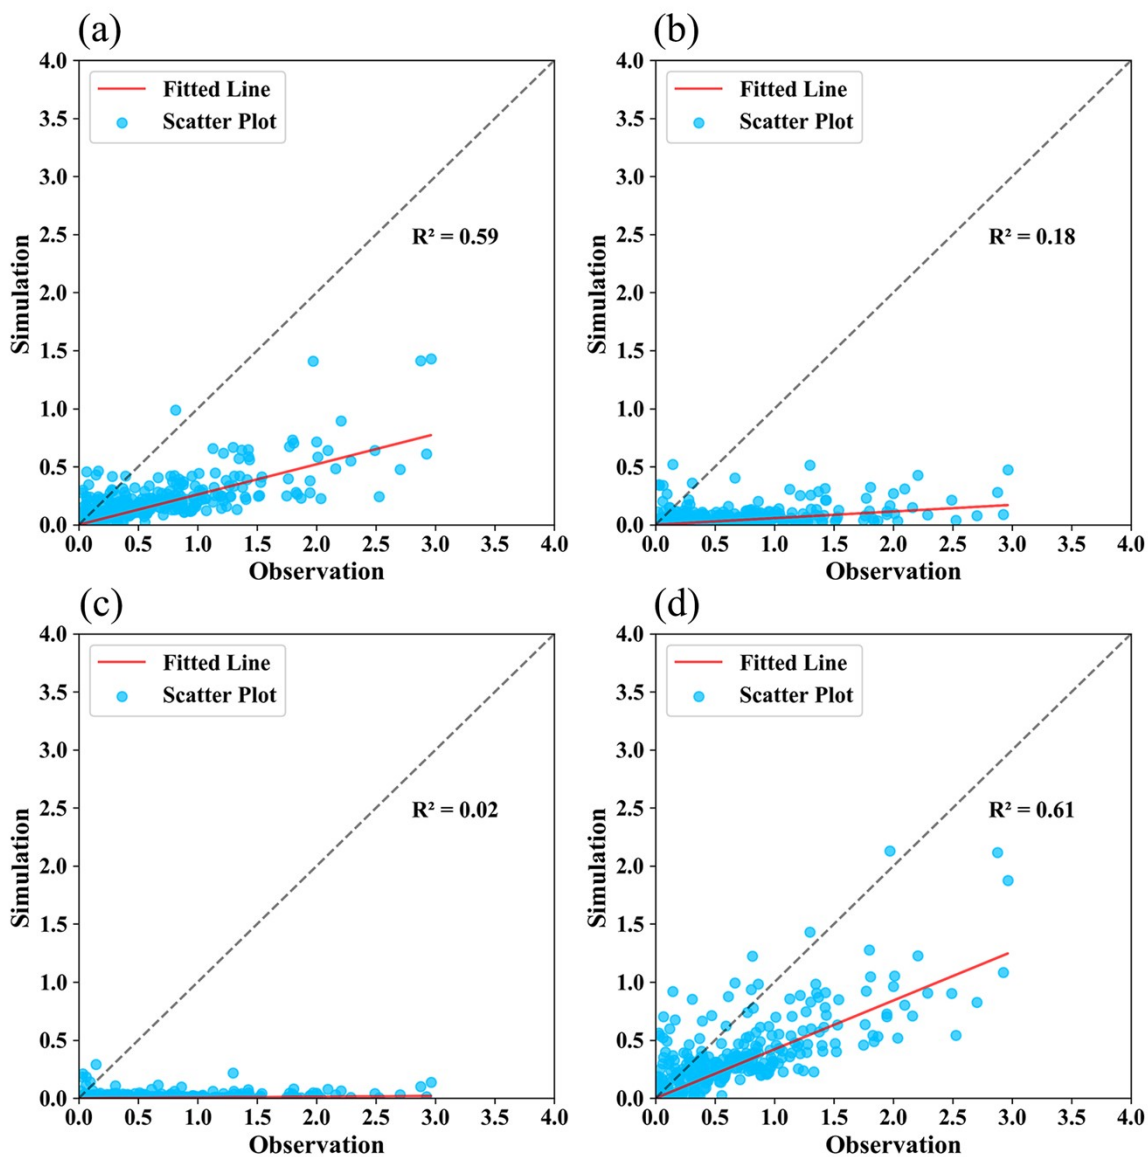

50

**Fig. S2** Evaluation of isoprene concentrations between observations and the simulations in the IAP in different cases ((a) B1, (b) B2, (c) B3, (d) B4 during June 1-25, 2017 (unit: ppb).

55

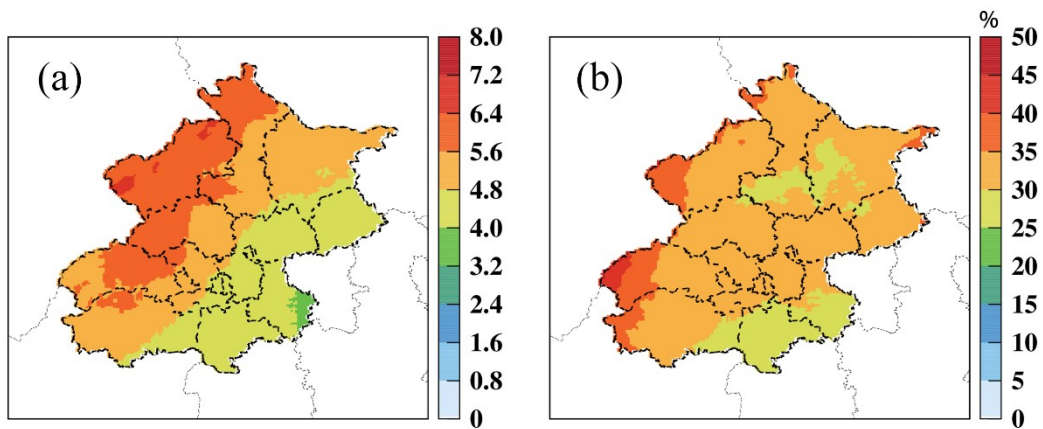

**Fig. S3** (a) The spatial distributions of the biogenic SOA (BSOA) formed from total BVOCs (unit:  $\mu\text{g m}^{-3}$ ) and (b) the contribution of BVOC emissions from areas outside Beijing to BSOA in B4 (unit: %).

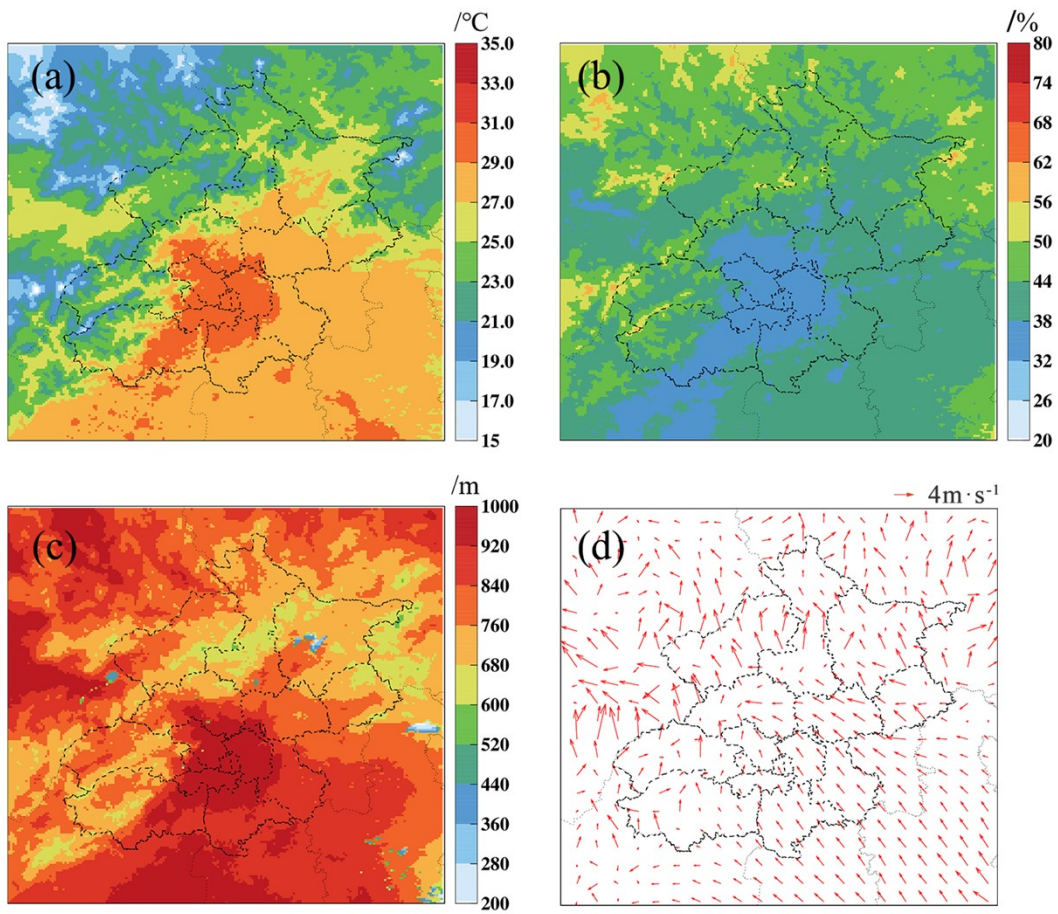

60

**Fig. S4** The regional meteorological conditions of (a) temperature, (b) humidity, (c) planetary boundary layer height, (d) wind speed.

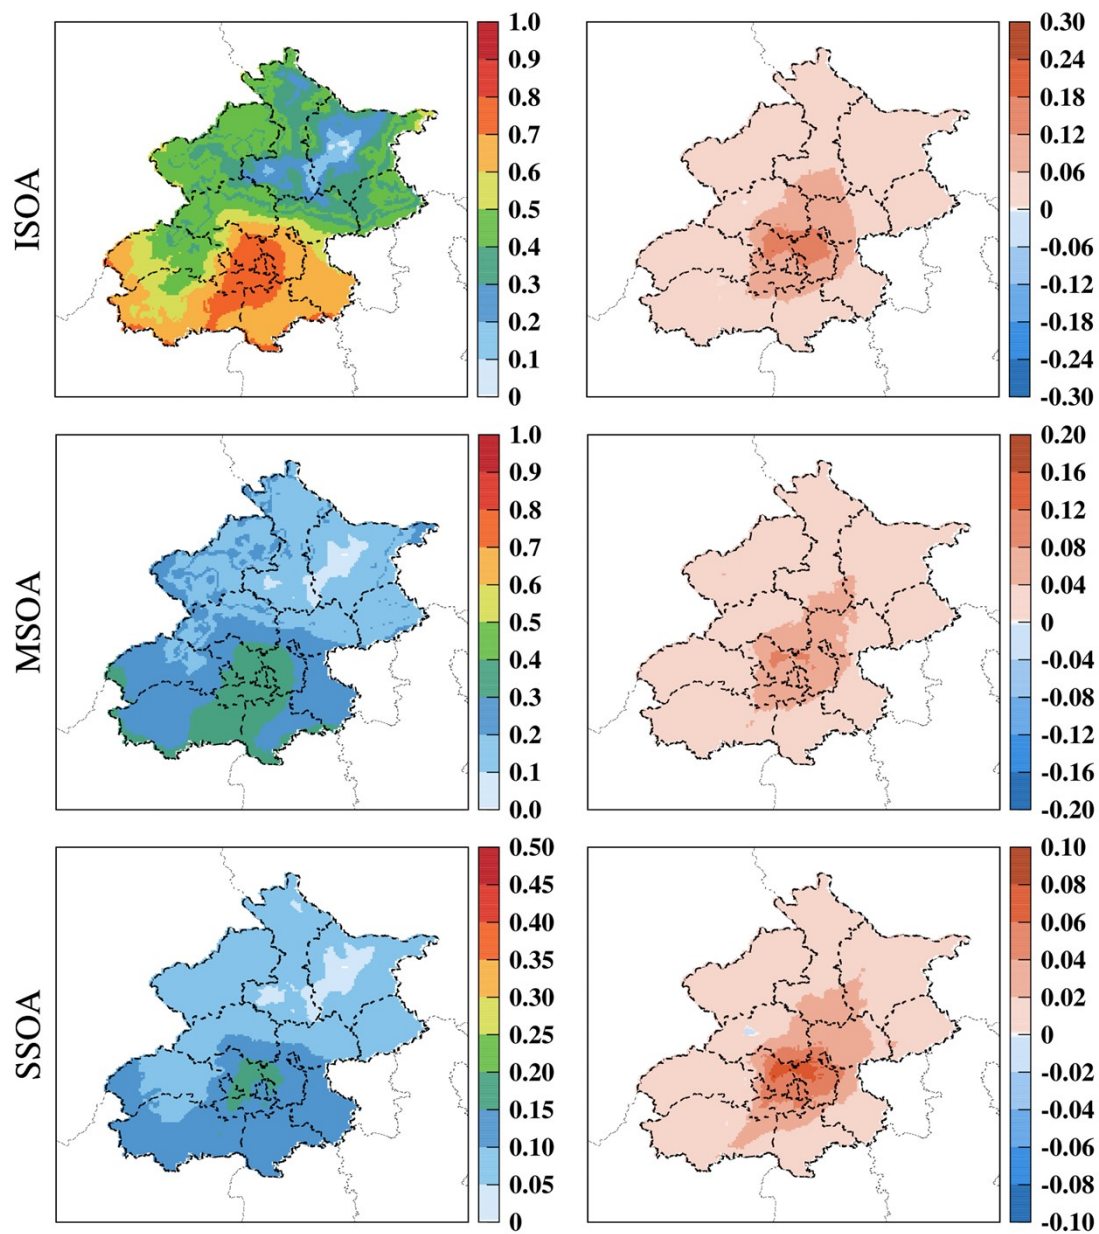

65 **Fig. S5** The regional distributions of SOA formed by the three main BVOC species from urban green spaces of Beijing (isoprene: ISOA, monoterpenes: MSOA, and sesquiterpenes: SSOA) and their difference between the B5 case and the B4 case, unit is  $\mu\text{g m}^{-3}$ .

**Reference**

1. G. Thompson, P. R. Field, R. M. Rasmussen and W. D. Hall, Explicit Forecasts of Winter Precipitation Using an Improved Bulk Microphysics Scheme. Part II: Implementation of a New Snow Parameterization, *Mon. Weather Rev.*, 2008, **136**, 5095-5115.
- 75 2. M. J. Iacono, J. S. Delamere, E. J. Mlawer, M. W. Shephard, S. A. Clough and W. D. Collins, Radiative forcing by long-lived greenhouse gases: Calculations with the AER radiative transfer models, *J. Geophys. Res. Atmos.*, 2008, **113**.
3. M.-D. Chou and M. J. Suarez, *A solar radiation parameterization for atmospheric studies*, Report NASA/TM-1999-104606 Vol.15, 1999.
- 80 4. J. Dudhia, *A Multi-layer Soil Temperature Model for MM5*, 6th PSU/NCAR Mesoscale Model Users Workshop, Boulder, 1996.
5. S.-Y. Hong, A new stable boundary-layer mixing scheme and its impact on the simulated East Asian summer monsoon, *Quart. J. Roy. Meteor. Soc.*, 2010, **136**, 1481-1496.
6. S.-Y. Hong, Y. Noh and J. Dudhia, A New Vertical Diffusion Package with an Explicit Treatment of Entrainment Processes, *Mon. Weather Rev.*, 2006, **134**, 2318-2341.
- 85 7. G. A. Grell and S. R. Freitas, A scale and aerosol aware stochastic convective parameterization for weather and air quality modeling, *Atmos. Chem. Phys.*, 2014, **14**, 5233-5250.
8. C. Emery, E. Tai and G. Yarwood, Enhanced meteorological modeling and performance evaluation for two texas episodes, Report to the Texas Natural Resources Conservation Commission, *prepared by ENVIRON, International Corp., Novato, CA*, 2001.
- 90 9. U. S. EPA, Guidance on the Use of Models and Other Analyses for Demonstrating Attainment of Air Quality Goals for Ozone, PM<sub>2.5</sub>, and Regional Haze, 2007, **EPA-454/B-07-002**.
